# Supplementary material for: New Highly Fluorescent Water Soluble Imidazolium-Perylenediimides: Synthesis and Cellular Response
Source: MDPI journal article supplement (doi:10.3390/pharmaceutics15071892), 2023-07-05

# **New highly fluorescent water soluble imidazolium-perylenediimides: Synthesis and cellular response**

|                                                                                  |           |
|----------------------------------------------------------------------------------|-----------|
| <b>Figure S1: <math>^1\text{H}</math> NMR spectrum of PDI-3</b>                  | <b>2</b>  |
| <b>Figure S2: <math>^{13}\text{C}</math> NMR spectrum of PDI-3</b>               | <b>2</b>  |
| <b>Figure S3: DEPT-135 spectrum of PDI-3</b>                                     | <b>3</b>  |
| <b>Figure S4: COSY spectrum of PDI-3</b>                                         | <b>3</b>  |
| <b>Figure S5: HSQC spectrum of PDI-3</b>                                         | <b>4</b>  |
| <b>Figure S6: <math>^1\text{H}</math> NMR spectrum of PDI-4</b>                  | <b>4</b>  |
| <b>Figure S7: <math>^{13}\text{C}</math> NMR spectrum of PDI-4</b>               | <b>5</b>  |
| <b>Figure S8: DEPT-135 spectrum of PDI-4</b>                                     | <b>5</b>  |
| <b>Figure S9: <math>^1\text{H}</math> NMR spectrum of PDI-1</b>                  | <b>6</b>  |
| <b>Figure S10: <math>^{13}\text{C}</math> NMR spectrum of PDI-1</b>              | <b>6</b>  |
| <b>Figure S11: DEPT-135 spectrum of PDI-1</b>                                    | <b>7</b>  |
| <b>Figure S12: <math>^1\text{H}</math> NMR spectrum of PDI-2</b>                 | <b>7</b>  |
| <b>Figure S13: <math>^{13}\text{C}</math> NMR spectrum of PDI-2</b>              | <b>8</b>  |
| <b>Figure S14: DEPT-135 spectrum of PDI-2</b>                                    | <b>8</b>  |
| <b>Figure S15: MALDI-TOF spectrum of PDI-3</b>                                   | <b>9</b>  |
| <b>Figure S16: MALDI-TOF spectrum of PDI-4</b>                                   | <b>9</b>  |
| <b>Figure S17: ESI spectrum of PDI-1</b>                                         | <b>10</b> |
| <b>Figure S18: ESI spectrum of PDI-2</b>                                         | <b>10</b> |
| <b>Figure S19: Fluorescence spectra after laser irradiation at 450 nm: PDI-1</b> | <b>11</b> |
| <b>Figure S20: Fluorescence spectra after laser irradiation at 450 nm: PDI-2</b> | <b>11</b> |

**Figure S1:  $^1\text{H}$  NMR spectrum of PDI-3 in  $\text{DMSO-}d_6$  (400 MHz, 25  $^\circ\text{C}$ )**

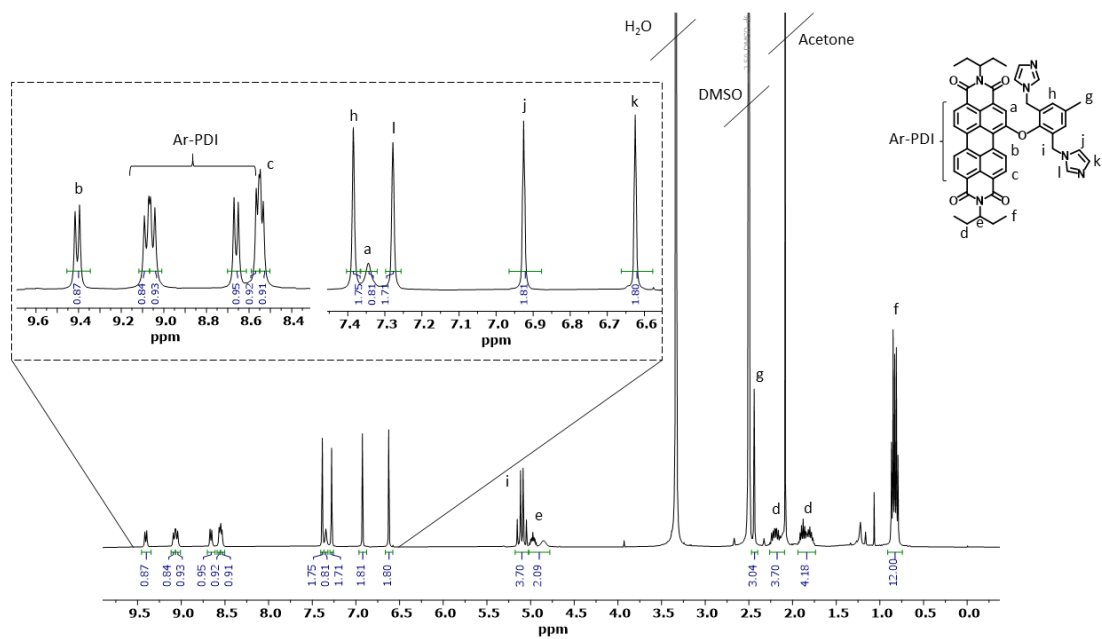

**Figure S2:  $^{13}\text{C}$  NMR spectrum of PDI-3 in  $\text{DMSO-}d_6$  (100 MHz, 25  $^\circ\text{C}$ )**

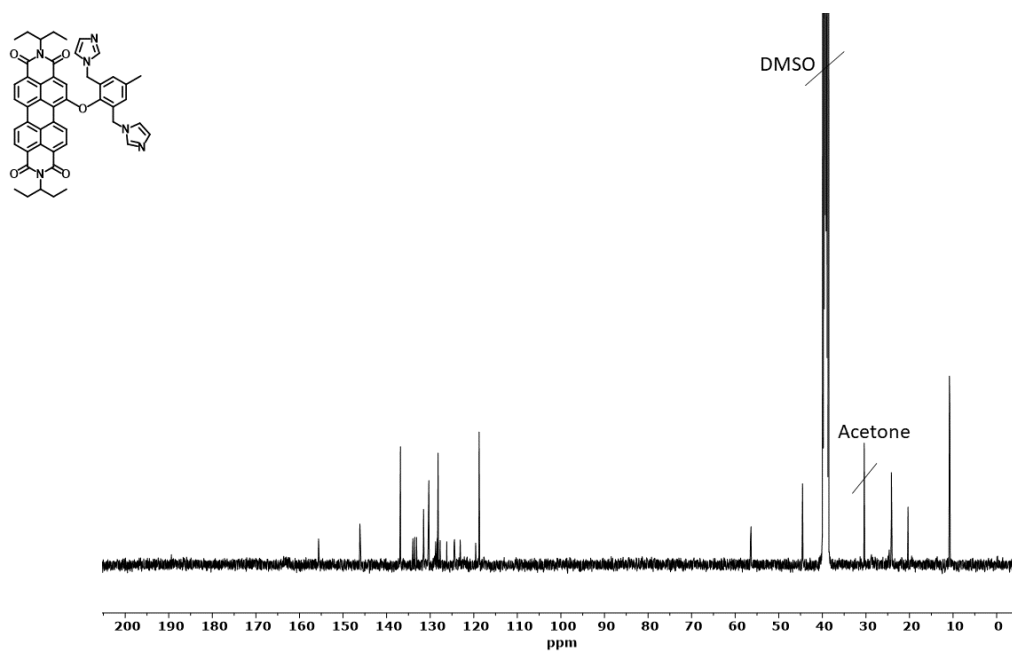

**Figure S3: DEPT-135 spectrum of PDI-3 in DMSO-*d*<sub>6</sub> (100 MHz, 25 °C)**

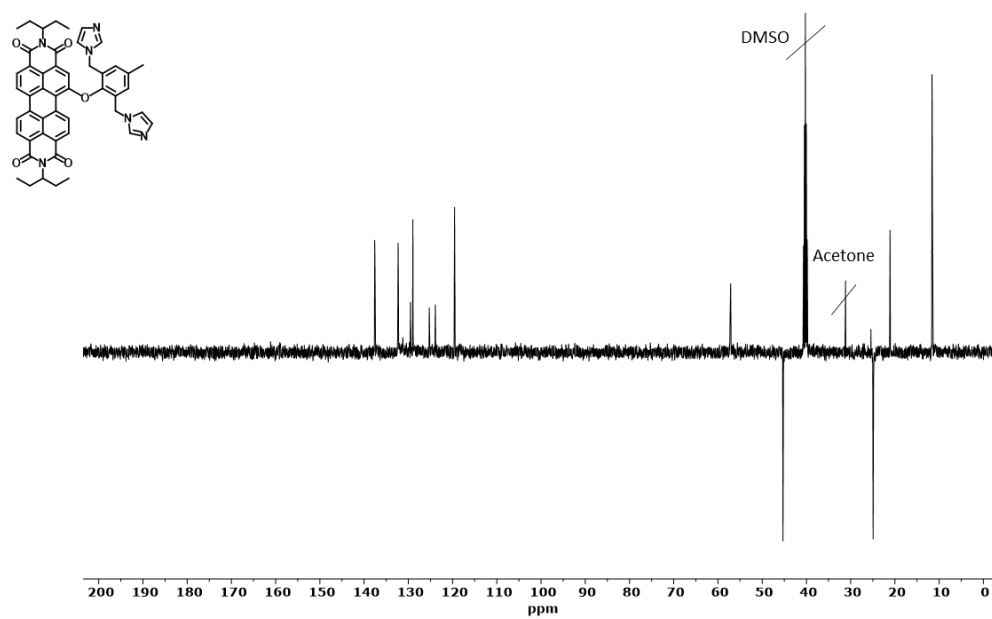

**Figure S4: COSY spectrum of PDI-3 in DMSO-*d*<sub>6</sub> (400 MHz, 25 °C)**

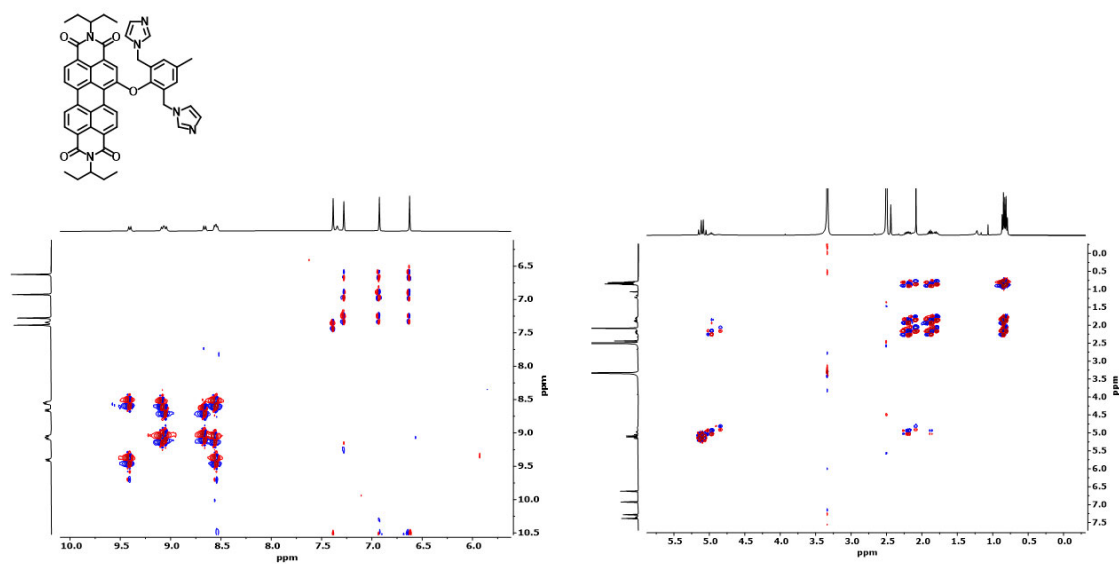

**Figure S5: HSQC spectrum of PDI-3 in DMSO-*d*<sub>6</sub> (400 MHz, 25 °C)**

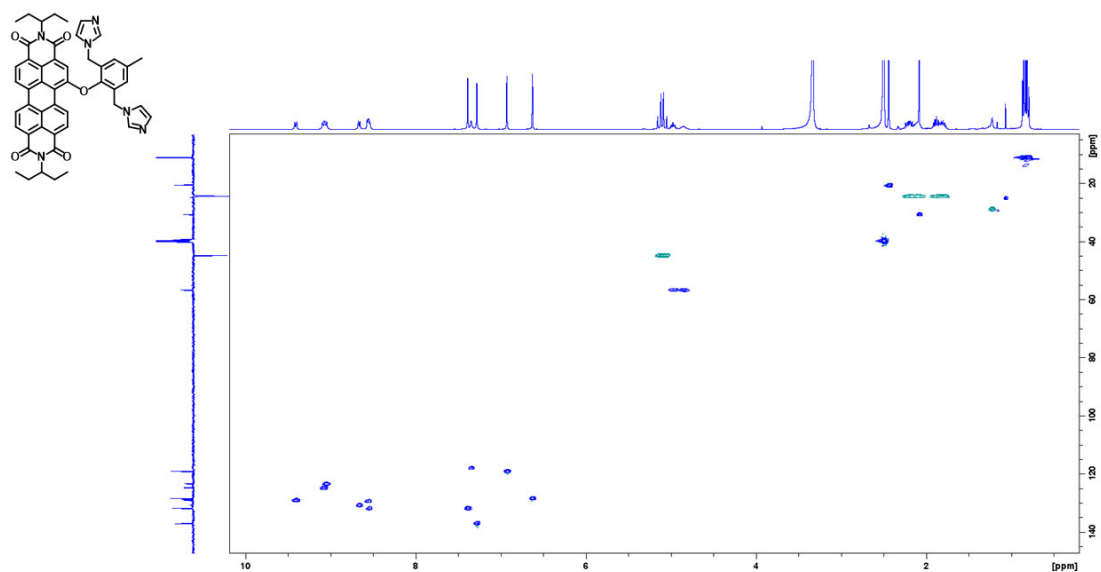

**Figure S6: <sup>1</sup>H NMR spectrum of PDI-4 in DMSO-*d*<sub>6</sub> (400 MHz, 25 °C)**

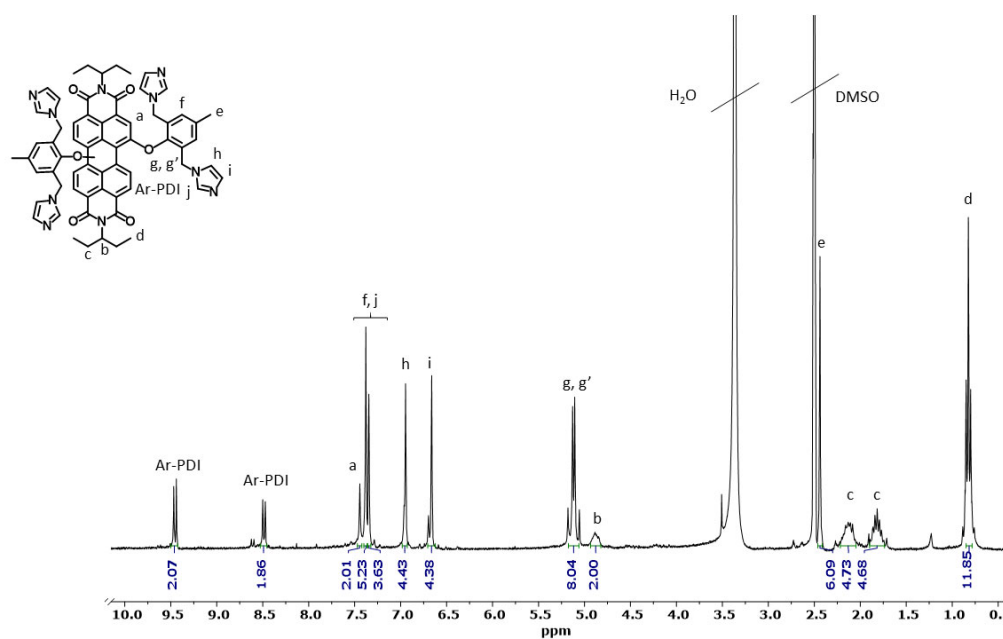

**Figure S7:  $^{13}\text{C}$  NMR spectrum of PDI-4 in  $\text{CDCl}_3$  (100 MHz, 25  $^\circ\text{C}$ )**

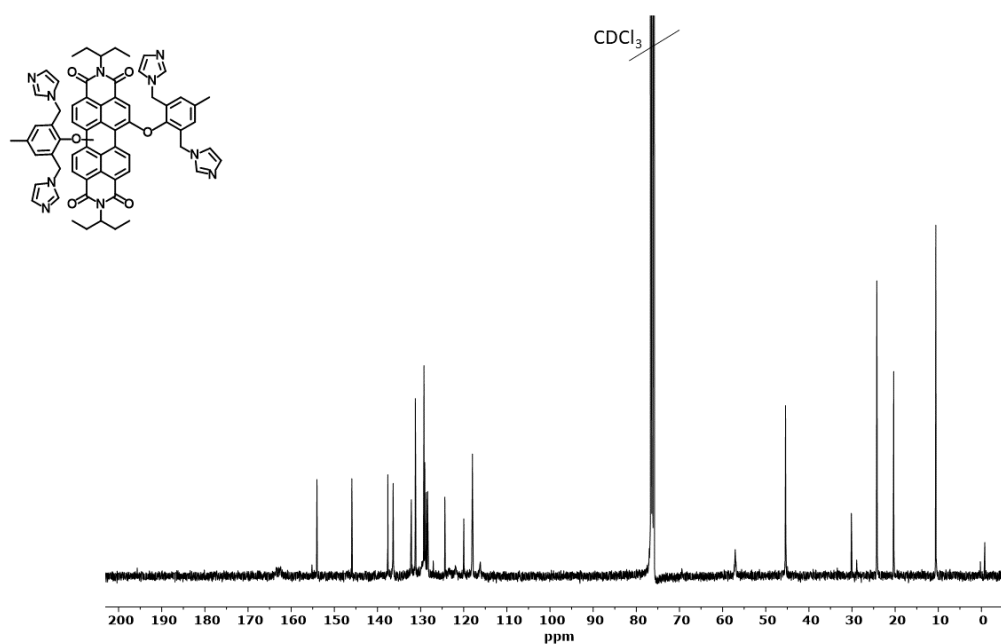

**Figure S8: DEPT-135 spectrum of PDI-4 in  $\text{CDCl}_3$  (100 MHz, 25  $^\circ\text{C}$ )**

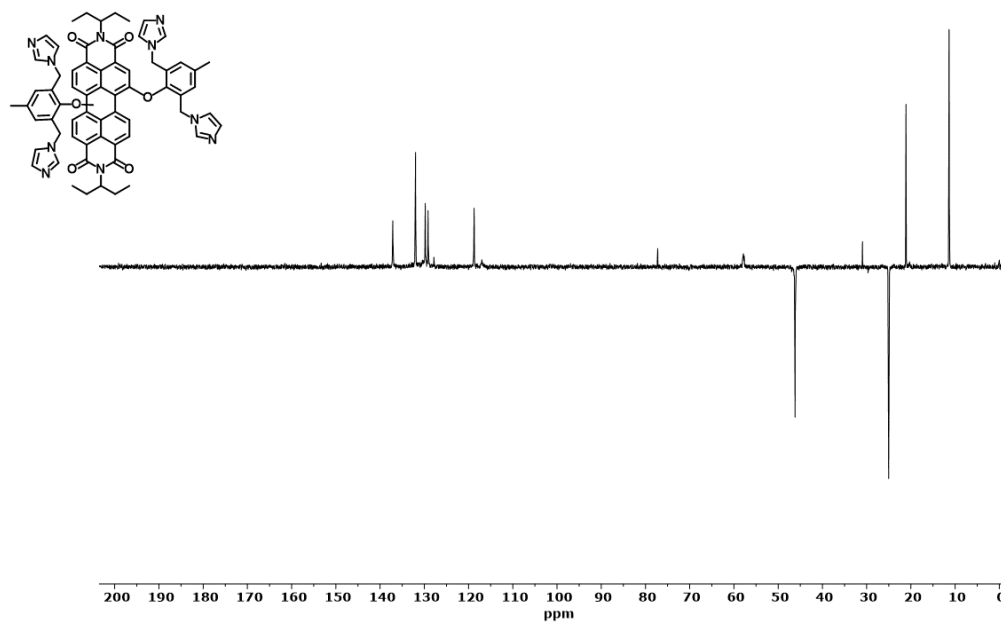

**Figure S9:  $^1\text{H}$  NMR spectrum of PDI-1 in  $\text{DMSO}-d_6$  (400 MHz, 25  $^\circ\text{C}$ )**

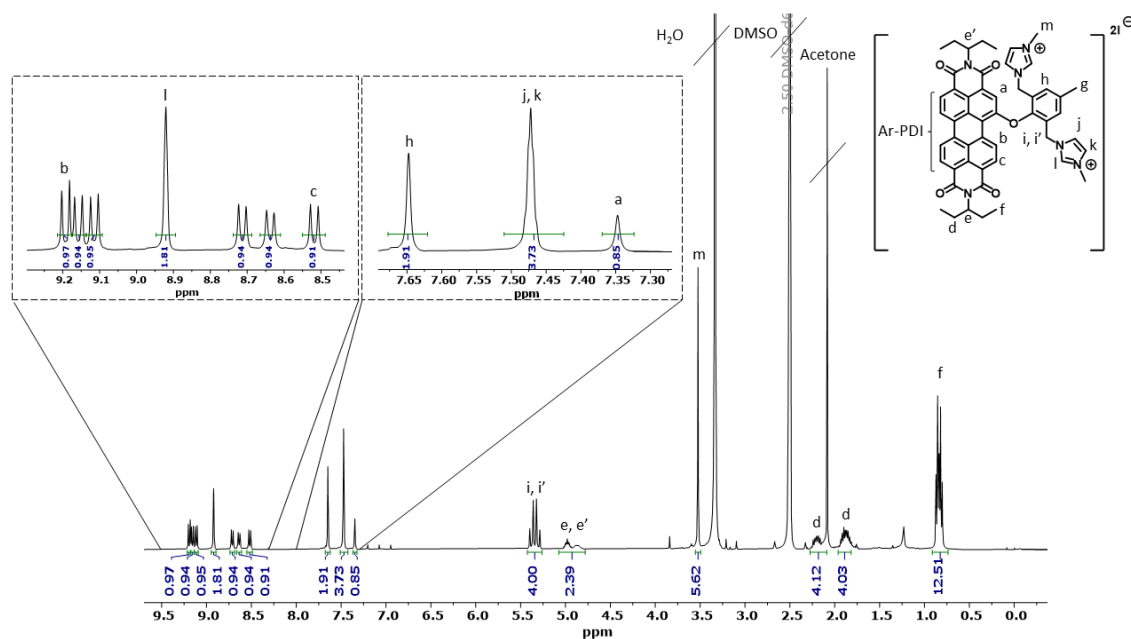

**Figure S10:  $^{13}\text{C}$  NMR spectrum of PDI-1 in  $\text{DMSO}-d_6$  (100 MHz, 25  $^\circ\text{C}$ )**

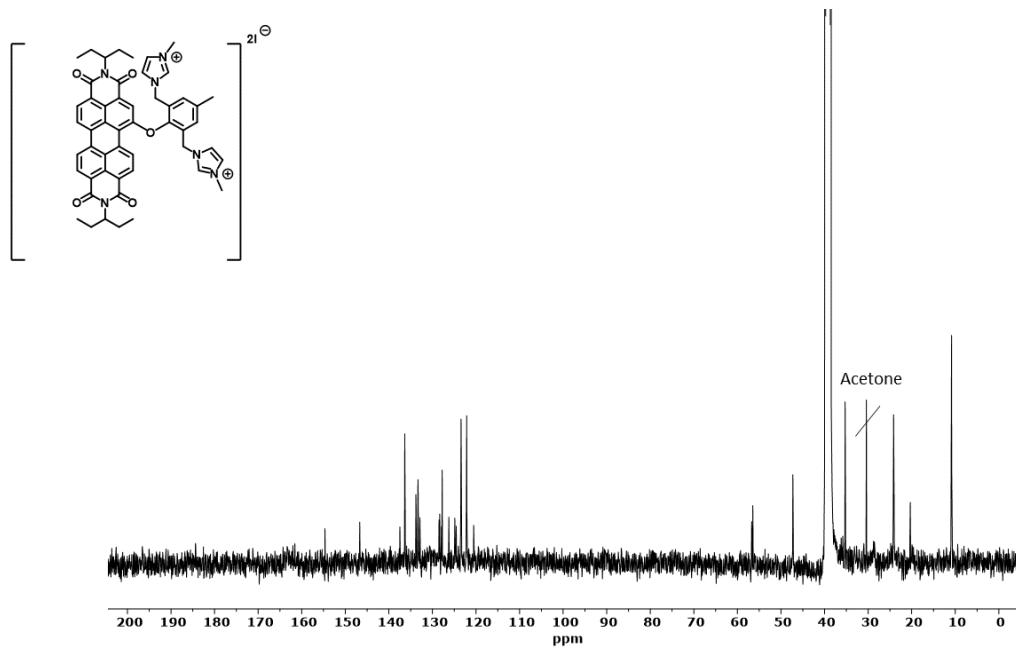

**Figure S11: DEPT-135 spectrum of PDI-1 in DMSO- $d_6$  (100 MHz, 25 °C)**

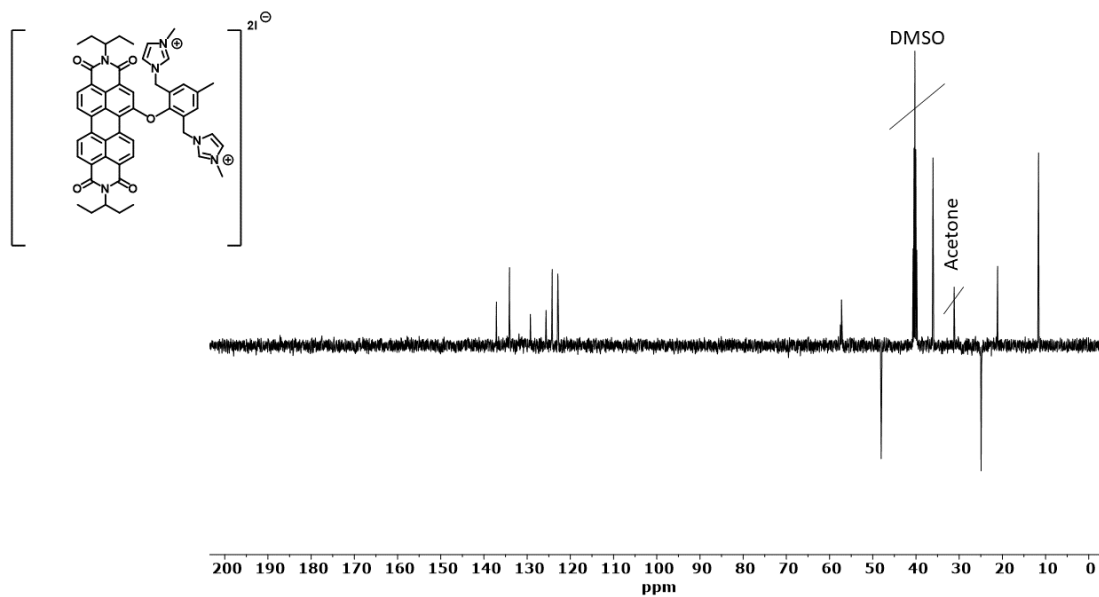

**Figure S12:  $^1\text{H}$  NMR spectrum of PDI-2 in DMSO- $d_6$  (400 MHz, 25 °C)**

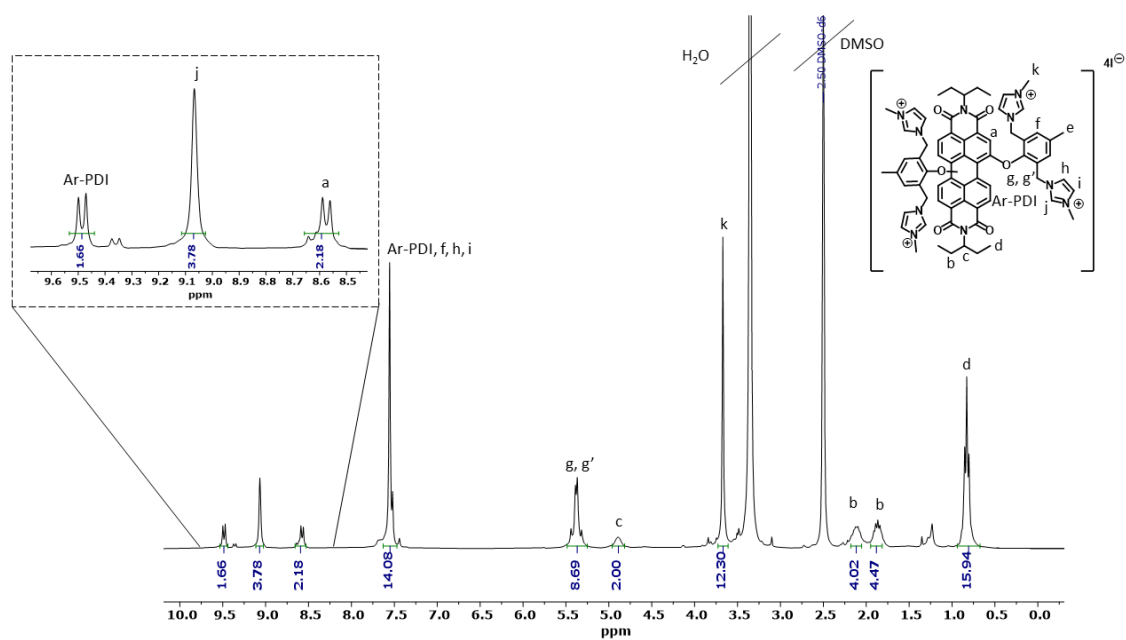

**Figure S13:  $^{13}\text{C}$  NMR spectrum of PDI-2 in  $\text{DMSO-}d_6$  (100 MHz, 25 °C)**

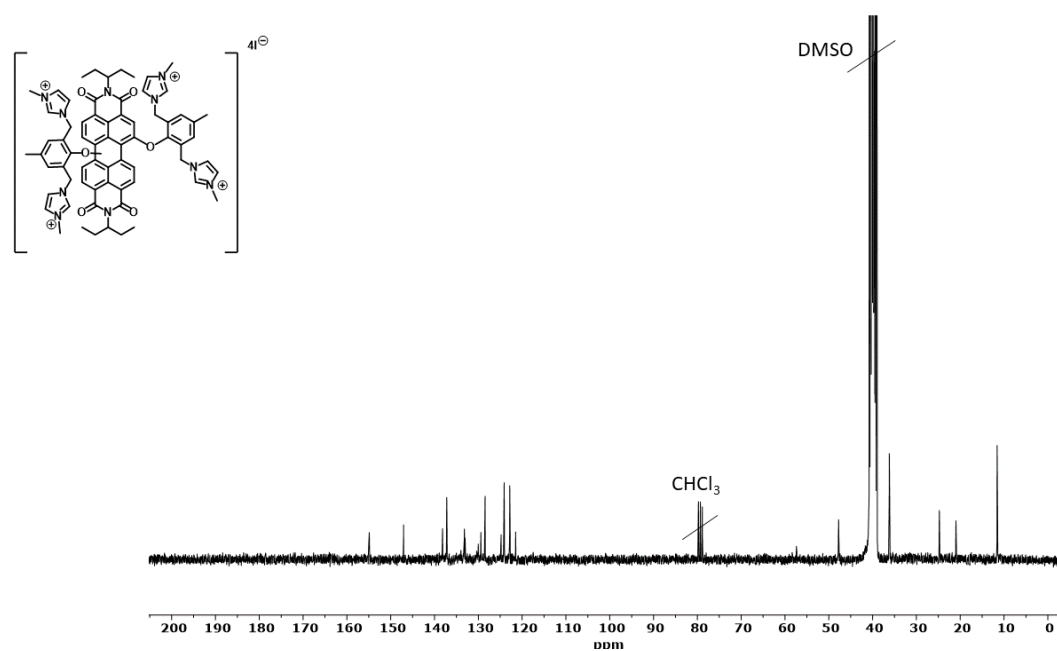

**Figure S14: DEPT-135 spectrum of PDI-2 in  $\text{DMSO-}d_6$  (100 MHz, 25 °C)**

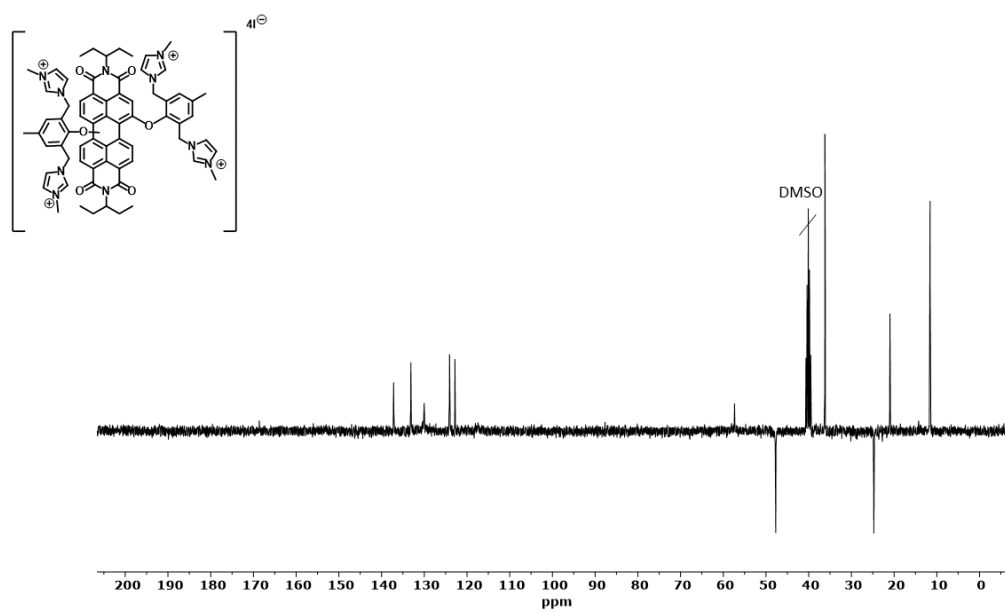



**Figure S15: MALDI-TOF spectrum of PDI-3**

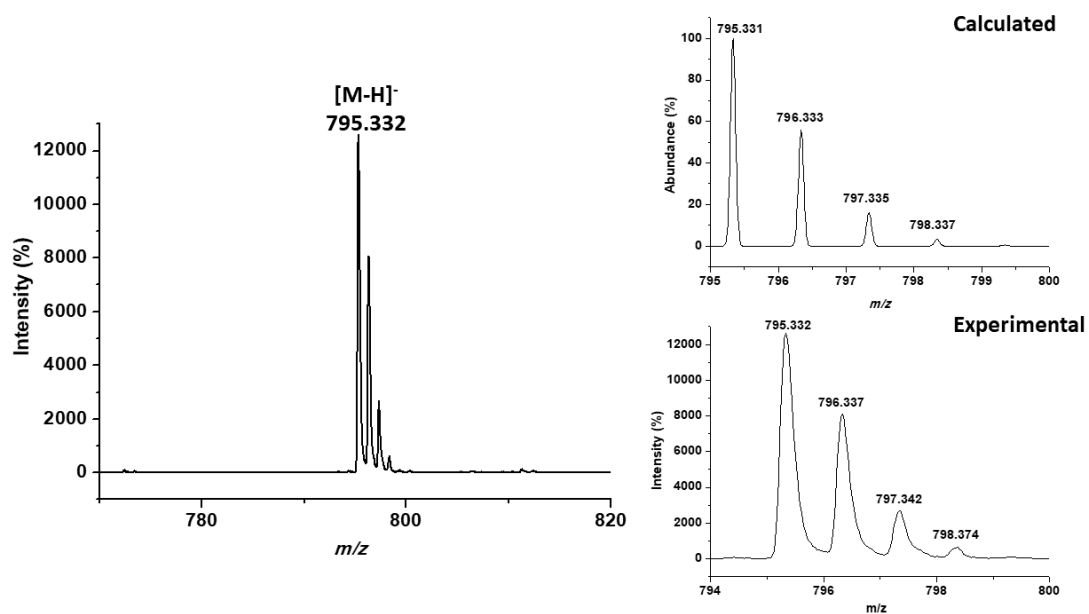

**Figure S16: MALDI-TOF spectrum of PDI-4.**

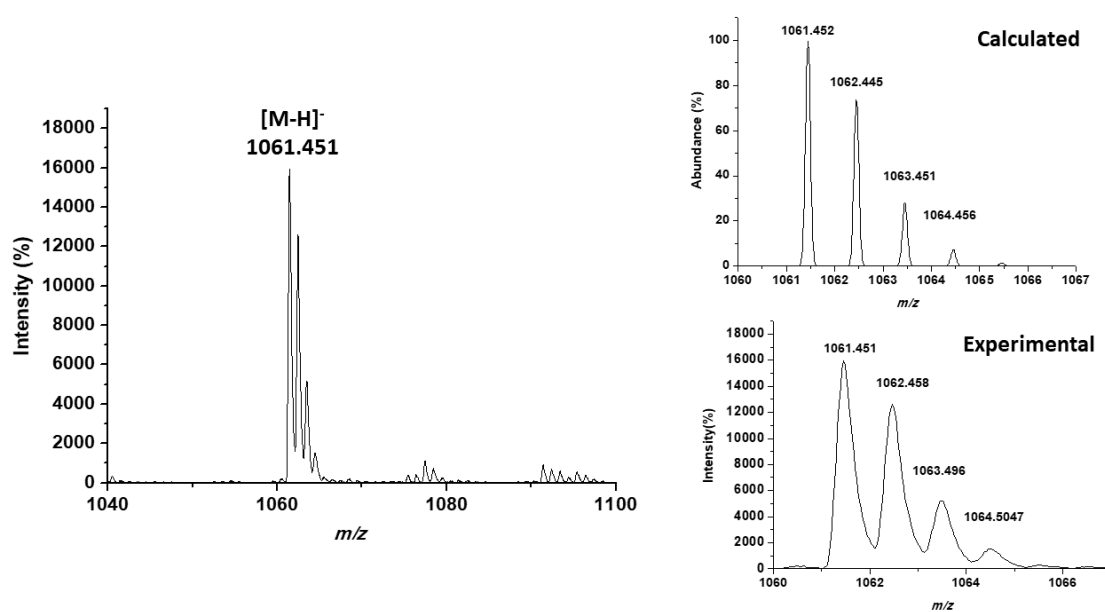

**Figure S17 ESI spectrum of PDI-1.**

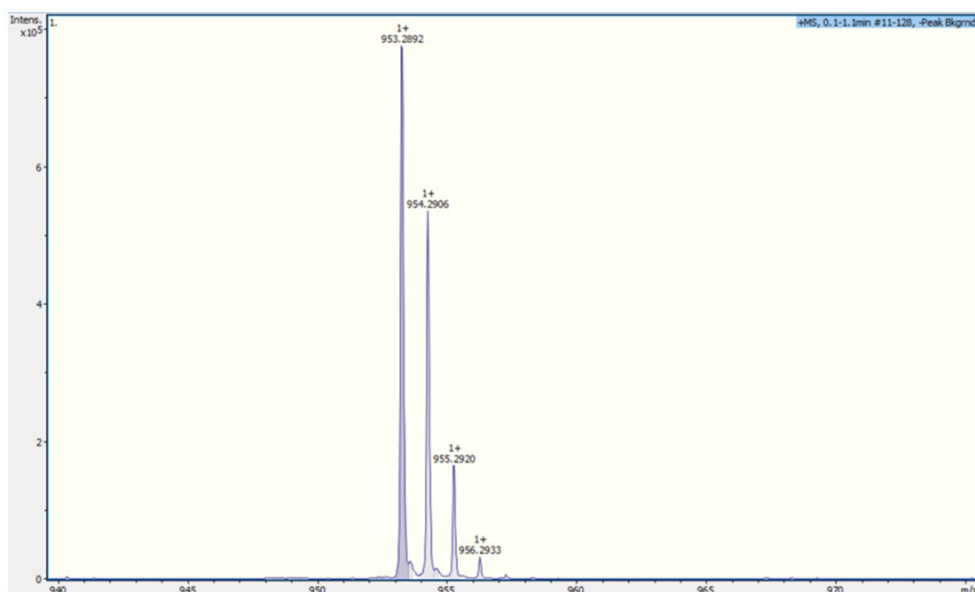

**Figure S18: ESI spectrum of PDI-2**

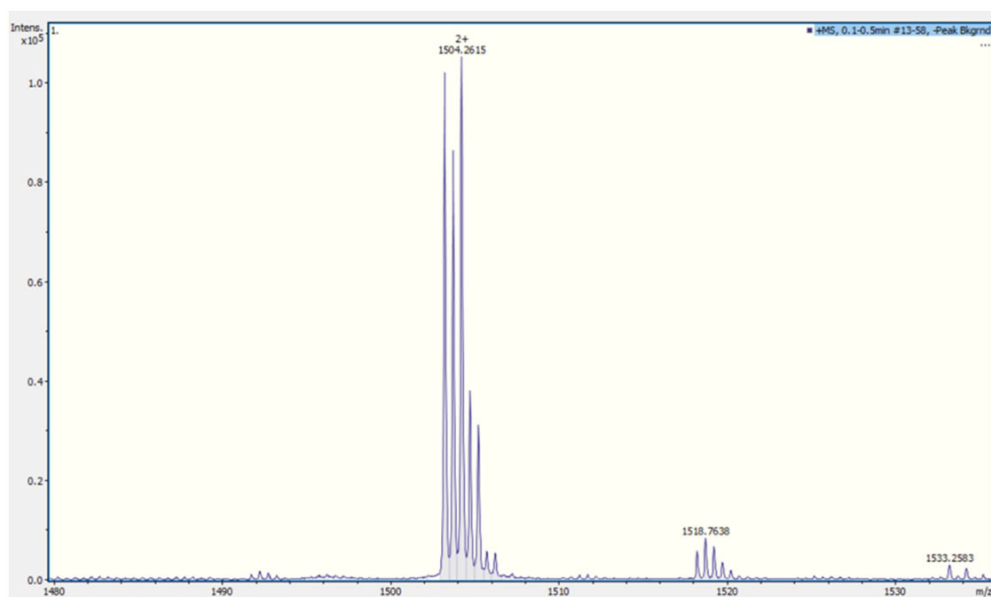

**Figure S19: Fluorescence spectra after laser irradiation at 450 nm: PDI-1 in acetonitrile (blue line) and pure acetonitrile (green line)**

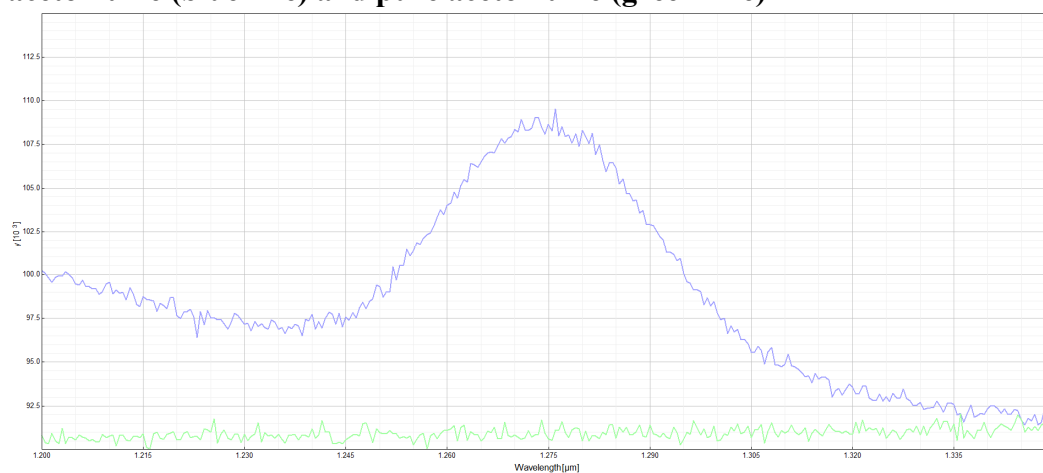

**Figure S20: Fluorescence spectra after laser irradiation at 450 nm: PDI-2 in acetonitrile (green line) and pure acetonitrile (blue line)**

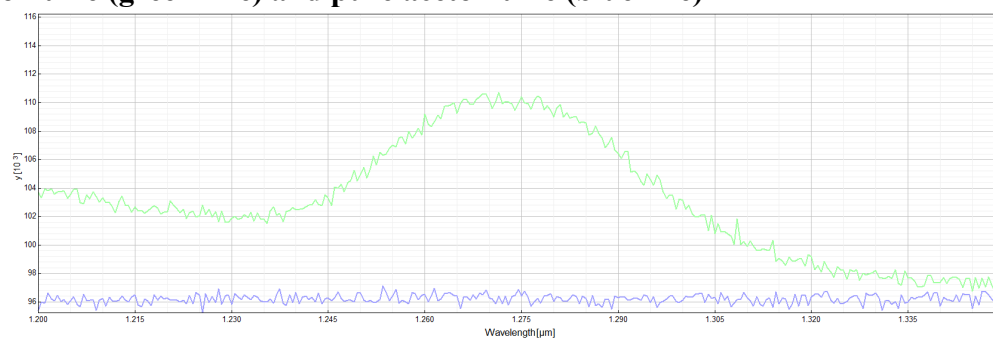

Supplement: s1 [file s1]
